# Supplementary material
Source: PubMed Central journal article supplement (PMC2911324)
Supplement: supp_M110.144063_jbc.M110.144063-2.pdf [file supp_M110.144063_jbc.M110.144063-2.pdf]

Suppl. Figure 2

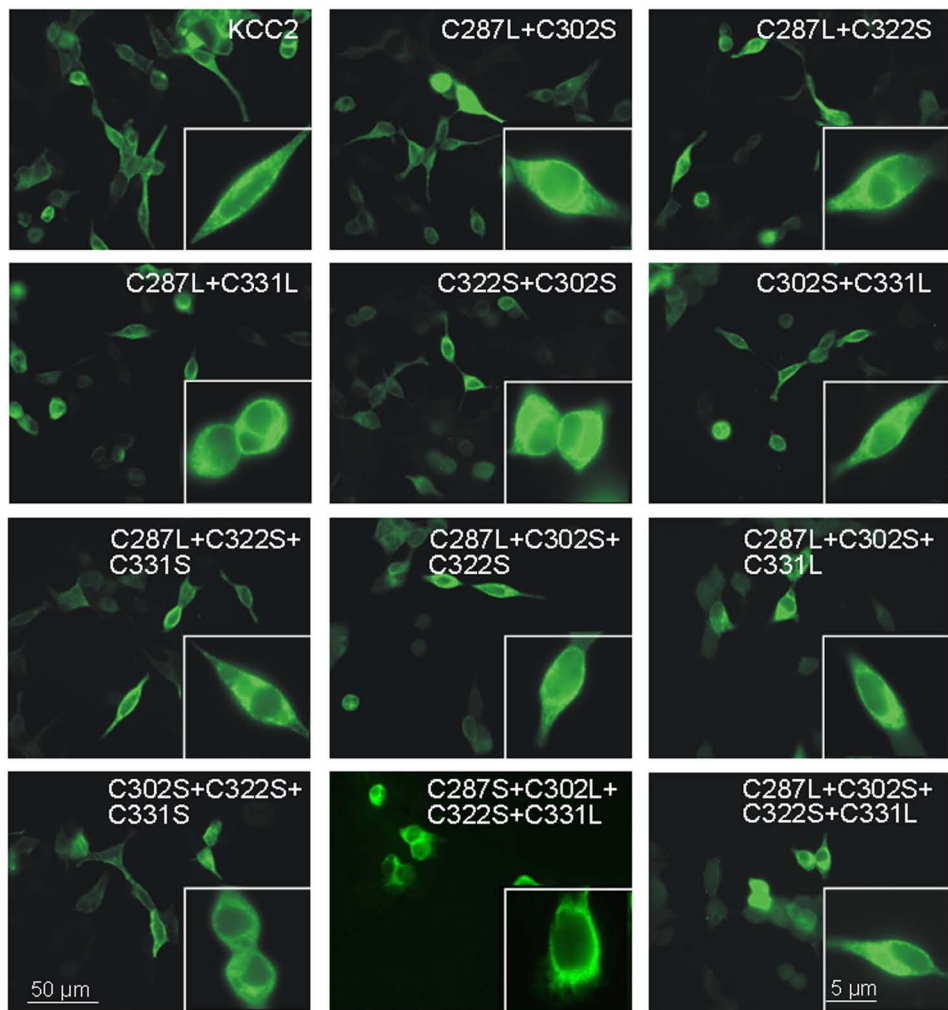

Suppl. Fig. 2 Double, triple and quadruple cysteine mutants of KCC2 are expressed in HEK-293 cells. HEK-293 cells were labeled with anti-KCC2 after transfection with double, triple and quadruple cysteine mutants of KCC2. KCC2-ir was detected for all constructs at the plasma membrane and the perinuclear region in a pattern, indistinguishable from KCC2wt.
