# Supplementary material
Source: PubMed Central journal article supplement (PMC2911324)
Supplement: supp_M110.144063_jbc.M110.144063-4.pdf [file supp_M110.144063_jbc.M110.144063-4.pdf]

## Suppl. Fig. 4

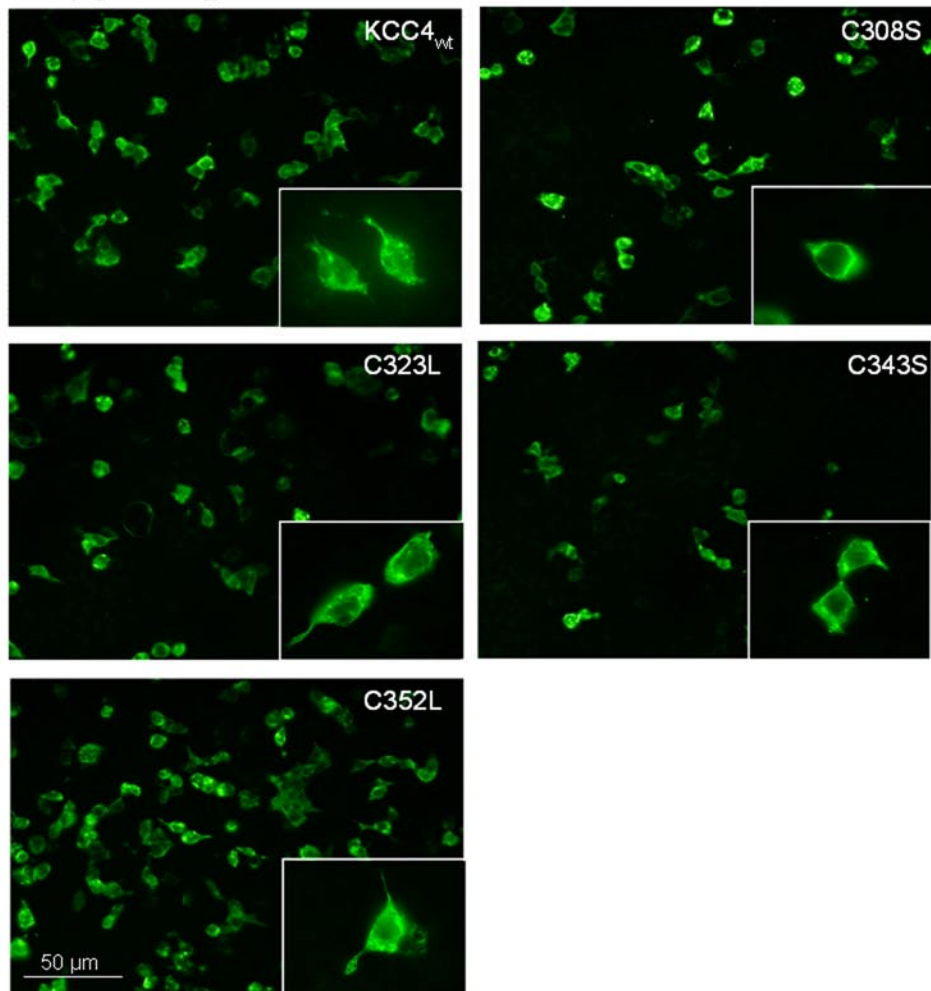

Suppl. Fig. 4 Cysteine mutants of KCC4 are expressed in HEK-293 cells. HEK-293 cells were transfected with KCC4<sub>wt</sub> or the KCC4 single mutants. KCC4-ir was detected for all mutant constructs at the plasma membrane and the perinuclear region in a pattern, indistinguishable from KCC4<sub>wt</sub>.
