# Supplementary material
Source: PubMed Central journal article supplement (PMC2911324)
Supplement: supp_M110.144063_jbc.M110.144063-5.pdf [file supp_M110.144063_jbc.M110.144063-5.pdf]

# Suppl. Figure 5

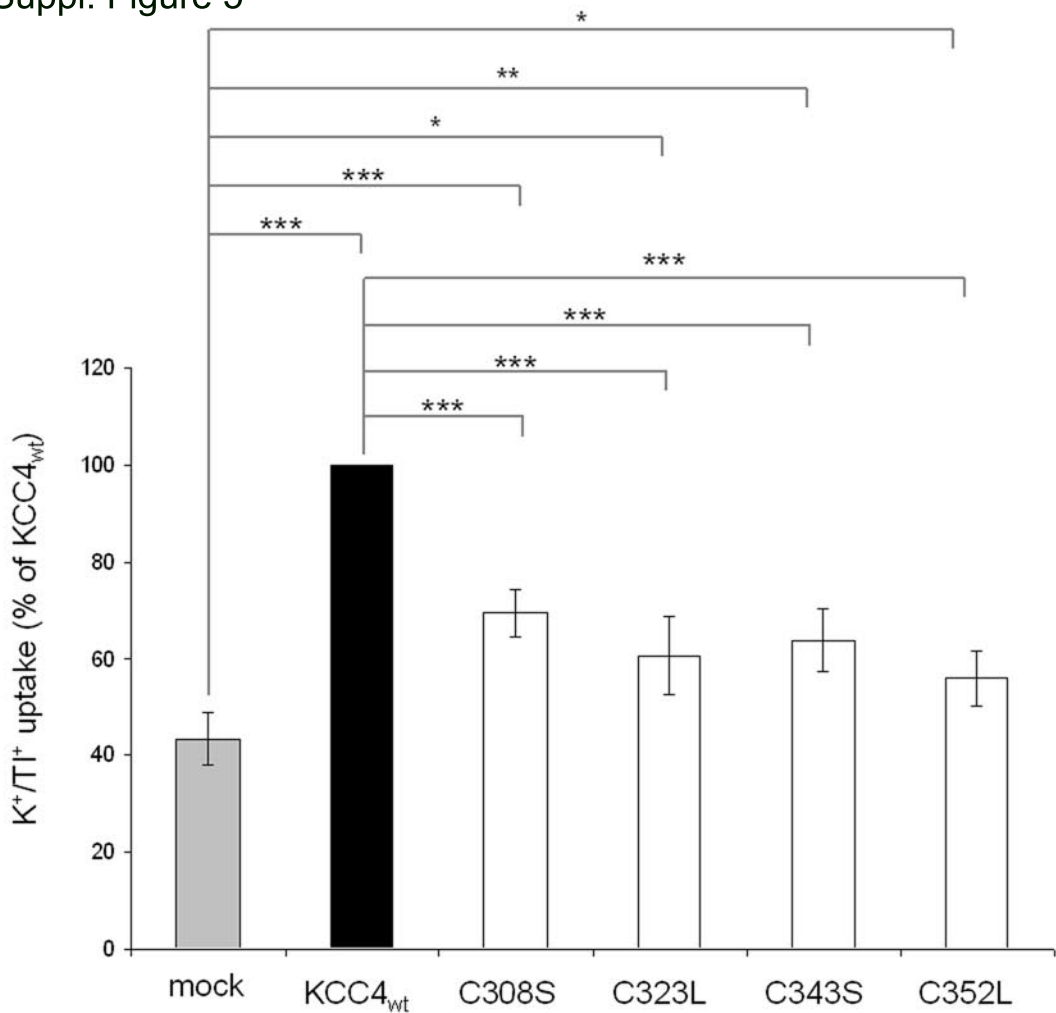

Suppl. Fig. 5 Single cysteine mutations in KCC4 are transport active in HEK-293 cells.

$K^+/TI^+$  uptake was determined for  $KCC4_{wt}$  or single cysteine mutants in HEK-293 cells 48 h after transfection. Expression of  $KCC4_{wt}$  resulted in 2.3 times higher activity compared to mock transfected cells. All cysteine single mutants showed significant transport activity. Plots depicts mean of three experiments.
